# Supplementary material for: The Targeted Sequencing of Alpha Satellite DNA in Cercopithecus pogonias Provides New Insight Into the Diversity and Dynamics of Centromeric Repeats in Old World Monkeys
Source: PubMed Central journal article supplement — Genome Biol Evol. 2018 Jun 1;10(7):1837–51. doi: 10.1093/gbe/evy109 (PMC6061836; doi:10.1093/gbe/evy109), 2018-06-01
Supplement: evy109_cacheuxsupprev.pdf [file evy109_cacheuxsupprev.pdf]

## Supplementary Tables

| Name      | frequency | Mean sequence identity | Cenp-B | pJalpha |
|-----------|-----------|------------------------|--------|---------|
| <b>C1</b> | 84        | 95                     | 0,04   | 96      |
| <b>C2</b> | 5         | 85                     | 0,09   | 84      |
| <b>C5</b> | 7         | 95                     | 0,02   | 96      |
| <b>C6</b> | 4         | 98                     | 0,05   | 98      |

**Table S1. Features of the four alpha satellite families identified within the CPO XmnI monomer dataset.** For each family, the frequency and sequence properties are shown. All numbers represent percentages. Sequence identities were calculated using a subset of 500 randomly selected sequences within each family. The percentages of sequences displaying the CENP-B or pJalpha fixation site were calculated for each family using all the sequences that were attributed to the family.

| Name       | Pattern (5'-3')      | Label           | Mismatch | C1       | C2       | C5       | C6       |
|------------|----------------------|-----------------|----------|----------|----------|----------|----------|
| <b>C1a</b> | TcCCtTtGcCaAtTcCAc   | 3'Cy3           | 0<br>1   | 63<br>86 | 1<br>4   | 64<br>87 | -<br>-   |
| <b>C1b</b> | AcTgCtCtGtGtTcTGtTa  | 3'Digoxigenin   | 0<br>1   | 68<br>91 | 1<br>29  | -<br>1   | 77<br>95 |
| <b>C2a</b> | TcACtTtGcAaAtTcCAc   | 5'AlexaFluor488 | 0<br>1   | -<br>5   | 22<br>57 | -<br>1   | -<br>-   |
| <b>C2b</b> | AcTgCtTtGtGtTcTGtTa  | 5'Cy5           | 0<br>1   | 1<br>69  | 26<br>58 | -<br>-   | -<br>78  |
| <b>C5a</b> | TgAaTtCaGaGaAcAcAg   | 3'Biotin        | 0<br>1   | -<br>2   | -<br>-   | 77<br>95 | -<br>1   |
| <b>C6a</b> | CaTTtTcCcTtCaAgAaTcC | 3'Digoxigenin   | 0<br>1   | -<br>-   | -<br>-   | -<br>-   | 74<br>96 |
| <b>Cx</b>  | tctcagaaagctt        | 3'Biotin        | 0<br>1   | 77<br>94 | 40<br>74 | 76<br>93 | 74<br>96 |

**Table S2. Design and properties of the oligonucleotide probes for FISH experiments.** The sequence of all the probes is indicated (LNA modifications are written in lower cases), as well as nature of the hapten used for detection. We also display the calculated percentage of sequences from each family that are expected to be recognized by each probe, either perfectly (0 mismatch) or with a single mismatch.

| Id | Sequence                 | Number | Forward (%) |
|----|--------------------------|--------|-------------|
| 1  | Consensus C1             | 2444   | 55          |
| 2  | C158G                    | 961    | 62          |
| 3  | C137A-CC149AA-C2A-G17Del | 468    | 51          |
| 4  | C114Del                  | 237    | 0           |
| 5  | C116T-A3741T-G64A        | 210    | 49          |
| 6  | T101Del                  | 164    | 96          |
| 7  | C116T                    | 132    | 61          |
| 8  | C114Del-C158G            | 114    | 100         |
| 9  | C137A-C158G              | 104    | 58          |
| 10 | A40C-C42G                | 103    | 60          |
| 11 | A3741T-G64A              | 95     | 51          |
| 12 | C2A                      | 79     | 44          |
| 13 | GC166TT                  | 79     | 71          |
| 14 | G64A                     | 75     | 48          |
| 15 | A86T                     | 75     | 50          |
| 16 | C116T-C158G              | 72     | 61          |
| 17 | T121A                    | 70     | 64          |
| 18 | A110G                    | 70     | 46          |
| 19 | T101Del-C158G            | 67     | 94          |
| 20 | A40C-C42G-G28T           | 60     | 67          |
| 21 | G17C                     | 59     | 56          |
| 22 | C137A-CC149AA            | 52     | 48          |
| 23 | C2A- C137A-CC149AA       | 50     | 52          |
| 24 | A3741T                   | 47     | 49          |
| 25 | C137A                    | 47     | 58          |
| 26 | C2A-G17Del               | 46     | 66          |
| 27 | C114A-C116A              | 46     | 43          |
| 28 | T60C                     | 45     | 58          |
| 29 | T38G                     | 41     | 55          |
| 30 | T39G                     | 40     | 60          |

**Table S3. Analysis of alpha satellite sequences found in high copy number in the CPO HindIII monomer dataset.** The sequences are numbered according to the “Id” column. The “Sequence” column indicates how each sequence variant differs from the consensus sequence of the C1 family, using standard notations. The “Number” column displays the number of identical copies of the sequence in the monomer dataset. The “Forward” column displays the percentage of reads obtained in the forward orientation (i.e. the orientation of our reference sequence). Strong biases for read orientation reveal artifactual sequences which are indicated on a grey background.

Supplementary Figures

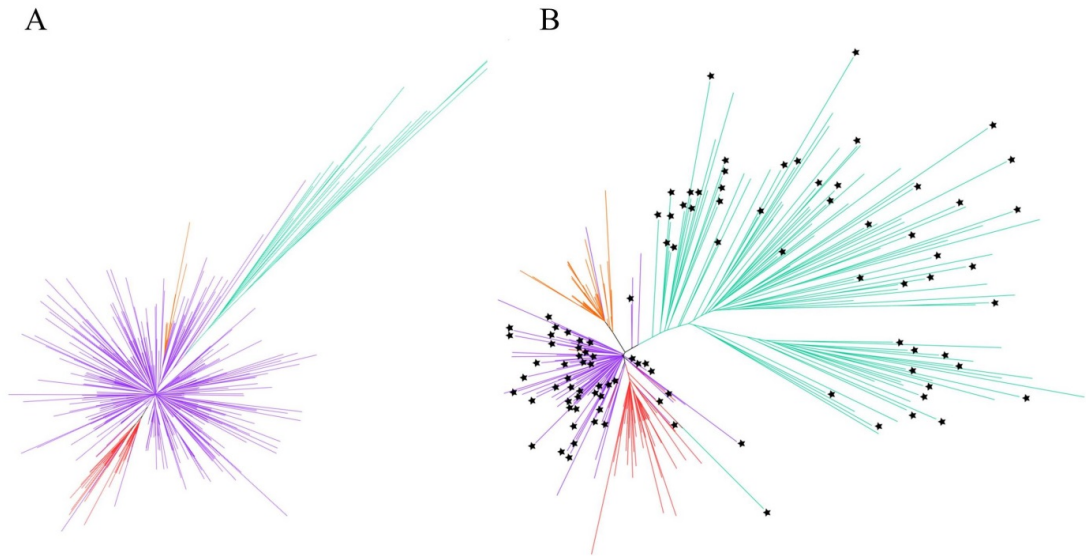

**Fig. S1. Phylogenetic trees for the characterization of alpha satellite DNA families in CPO.** (A) Phylogenetic tree (Neighbor-joining method, K2P model) for 500 randomly selected monomer sequences, colored according to their assignment to the C1 (purple), C2 (pastel green), C5 (red) or C6 (orange) alpha satellite family. (B) Phylogenetic tree (Neighbor-joining method, K2P model) for 50 randomly selected monomer sequences from the CSO C1 and C2 families (labeled with stars) and from the CPO C1, C2, C5 and C6 families. The color code matches the one described for (A). MUSCLE (Edgar, 2004) was used for alignment.

|    |                                                                                        |                                                                 |  |
|----|----------------------------------------------------------------------------------------|-----------------------------------------------------------------|--|
| 1  |                                                                                        | <u>C1b/C2b</u>                                                  |  |
| C1 | GCTTCTTGAAGGGAAAGATGTA                                                                 | CTCTGTGAGATGAATTAACAGAACACAGAGCAGTTTCTCAGAAAGCTTCTTTCCAGTTTGGAA |  |
| C2 | .....G.....C.....                                                                      | .....A.....T..                                                  |  |
| C5 | .....N.....C.G.....                                                                    |                                                                 |  |
| C6 | .....                                                                                  |                                                                 |  |
|    |                                                                                        | <u>C5a</u>                                                      |  |
| 87 |                                                                                        | <u>C1a/C2a/C6a</u>                                              |  |
| C1 | CGGAAGATATTTCTTTTTCACCATAGCCCTCTATGGGCTTCCAAATATCCCTTTGCCAATTCACACAAGAACAGCCTTAGCGAAAG |                                                                 |  |
| C2 | .N.....                                                                                | .....A.....A.....T.....                                         |  |
| C5 | .....                                                                                  |                                                                 |  |
| C6 | .....                                                                                  | .....A.....AA.....                                              |  |

**Fig. S2. Localization of the sequences that are recognized by the different probes used in the FISH experiments.**

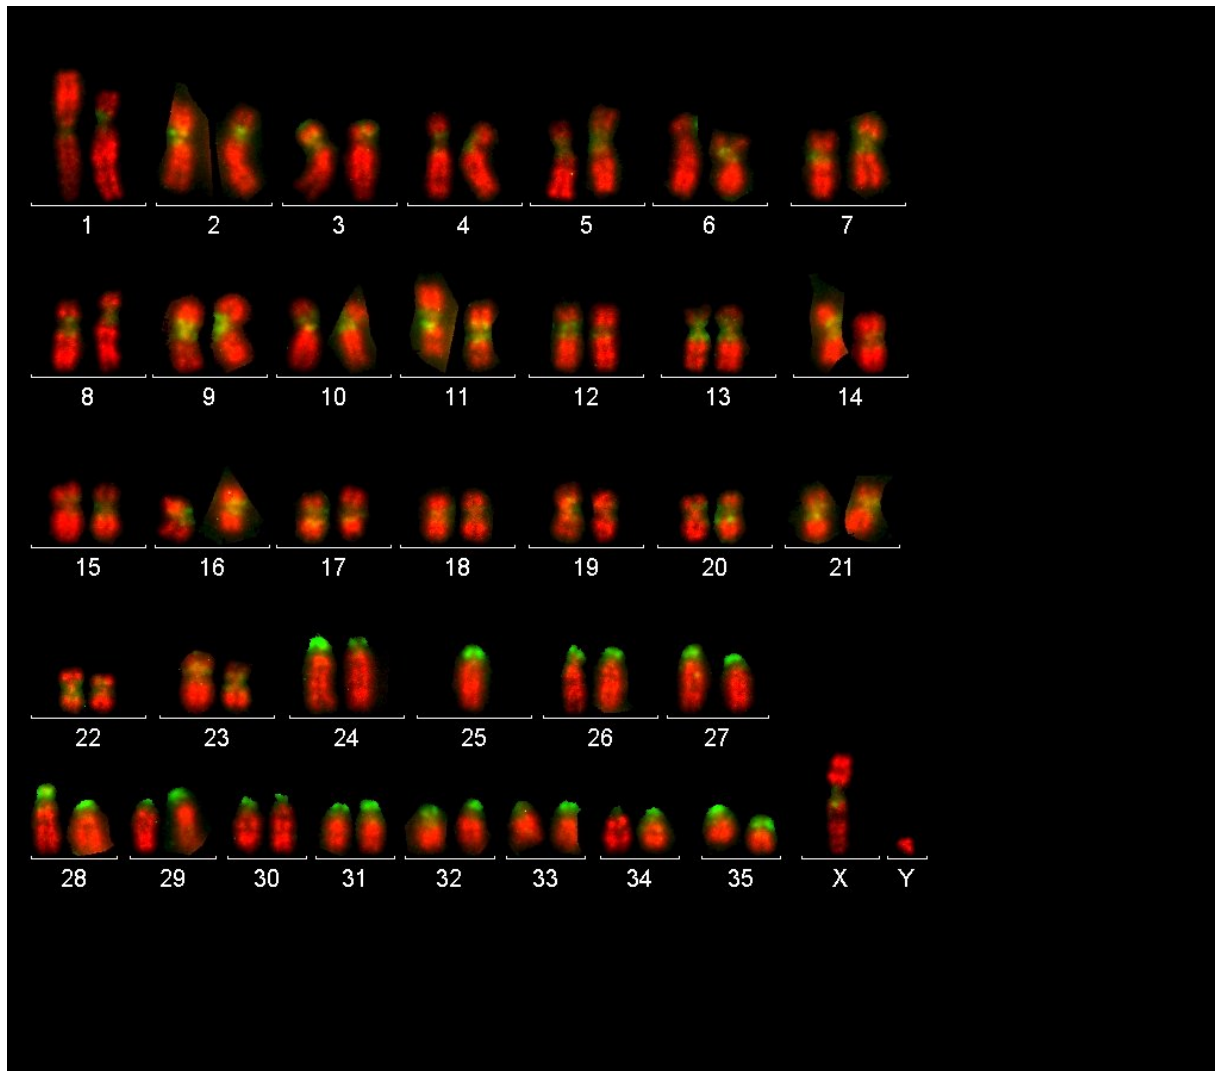

**Fig. S3. Distribution pattern of the C2 alpha satellite family on CPO chromosomes.**

Metaphase chromosomes are counterstained with propidium iodide (2  $\mu\text{g/mL}$ ) and shown here in red, while the green colors stand for probe C2b. RBG chromosome banding techniques were employed as in Moulin et al. (2008). Observation was performed with an epifluorescent microscope (Microphot-FXA, Nikon) and images were captured using a cooled CCD camera (ProgRes MFcool, Jenoplik). The metaphase was karyotyped using the Isis 5.3 software (Metasystems, Altussheim, Germany) according to Dutrillaux et al. (1979).

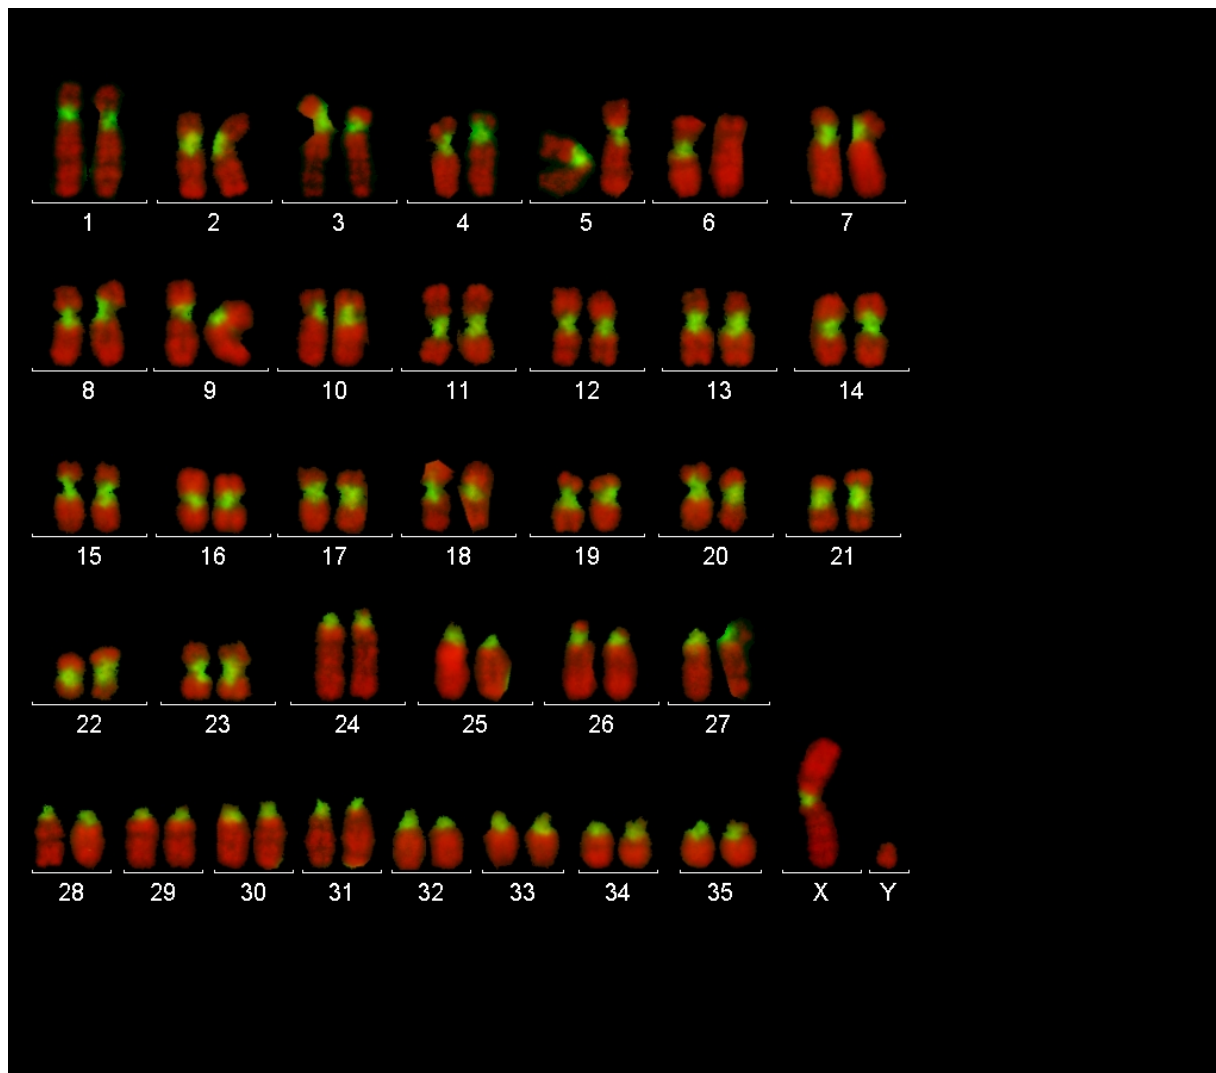

**Fig. S4. Hybridization pattern of probe Cx on CPO chromosomes.** Hybridization of probe Cx (green) on metaphase chromosomes (red). The Y chromosome and one chromosome 6 are not labeled (See the legend of supplementary fig. S3 for more information about methods)

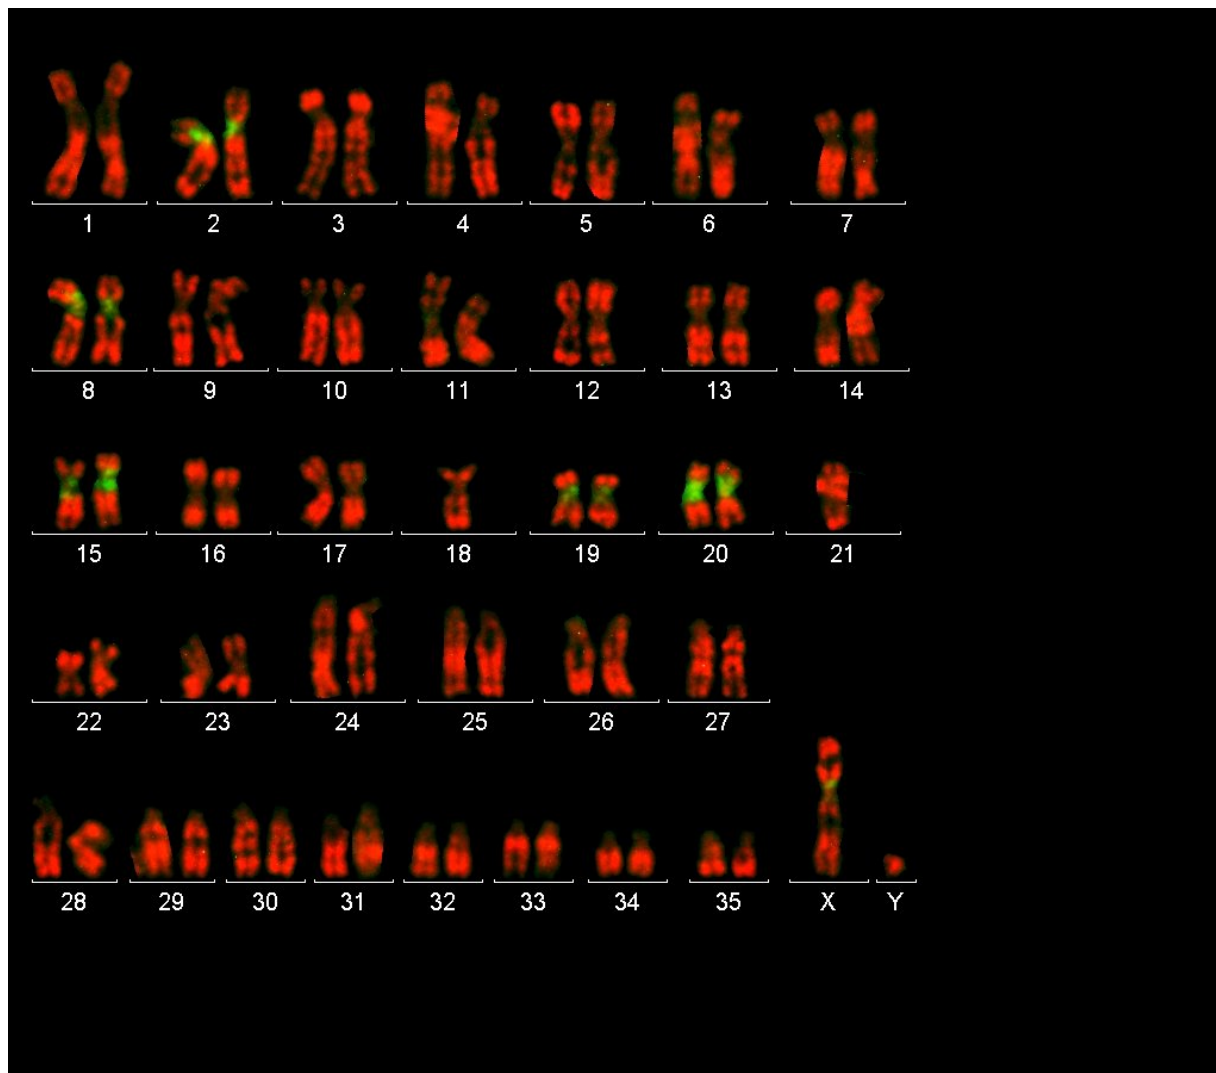

**Fig. S5. Distribution pattern of the C5 alpha satellite family on CPO chromosomes.** Hybridization of probe C5a (green) on metaphase chromosomes (red). (See the legend of supplementary fig. S3 for more information about methods)

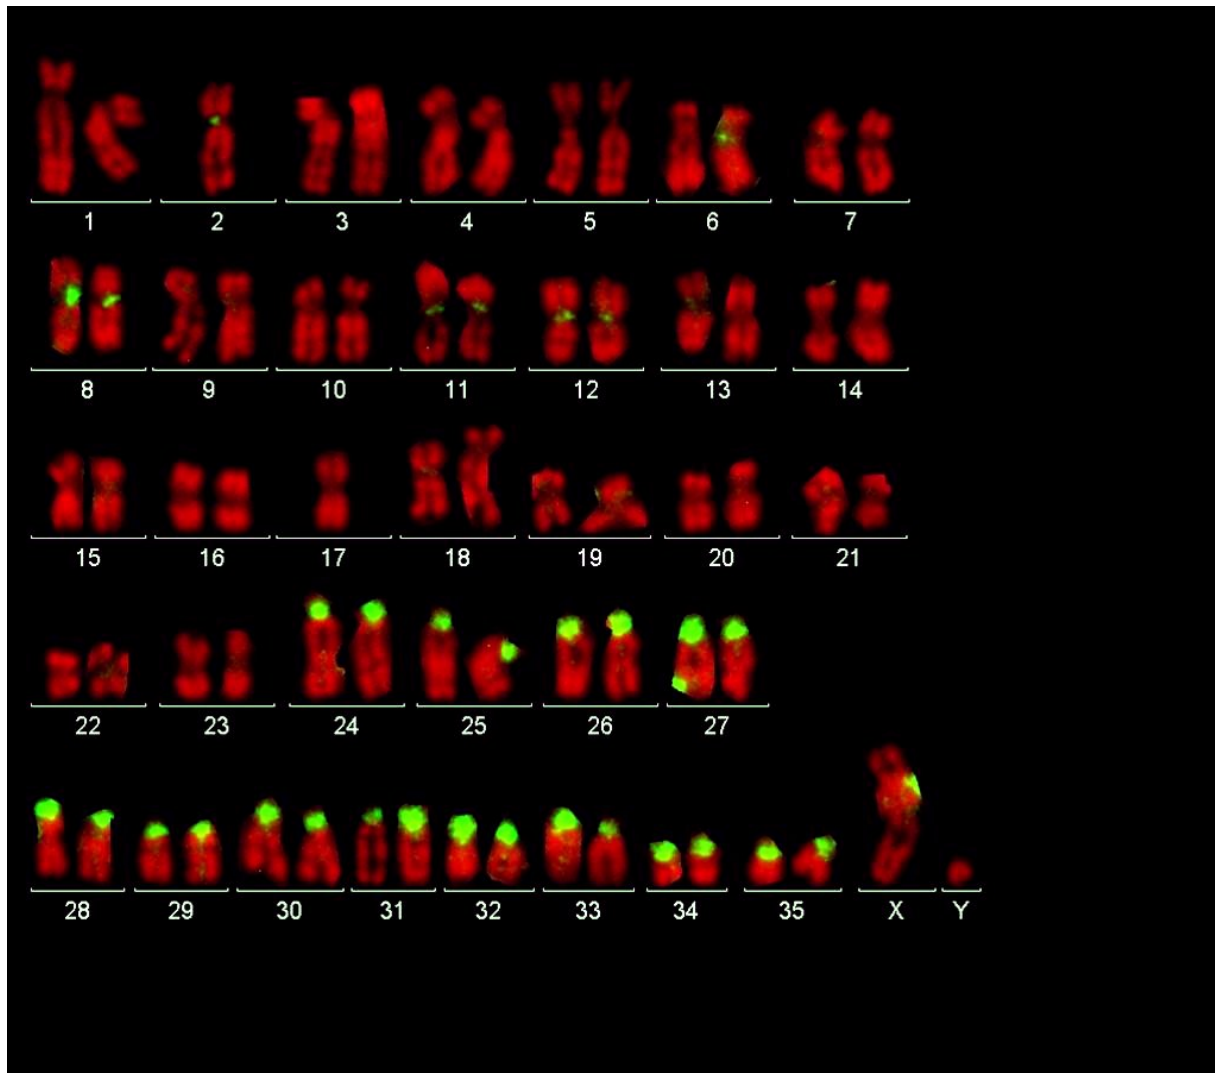

**Fig. S6. Distribution pattern of the C6 alpha satellite family on CPO chromosomes.** Hybridization of probe C6a (green) on metaphase chromosomes (red). The analysis of several metaphases allowed determining that a single chromosome 2 is labeled by probe C6a in the studied specimen. Only one chromosome 6 is labeled, which is consistent with the results shown in Fig S4. Apparent C6a signals on the long arm of left chromosome 27 and on chromosome X are artifacts due to chromosome superposition in the original metaphase. (See the legend of supplementary fig. S3 for more information about methods)

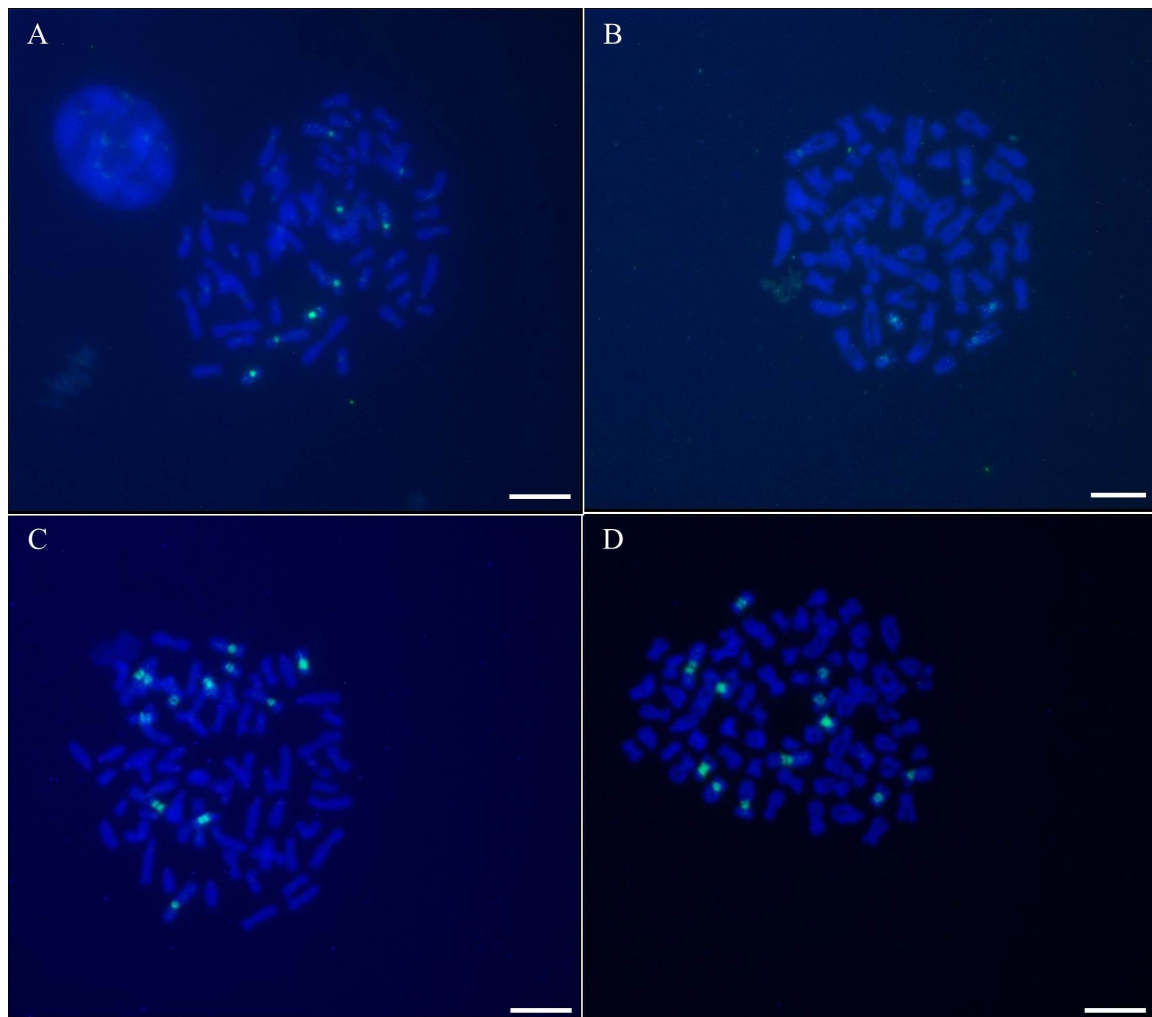

**Fig. S7. Hybridization of the C5a probe on CSO chromosomes.** (A) and (B) Metaphase chromosomes from CSO (female sample ID : 1979-013, as in our previous study). (C) and (D) Metaphase chromosomes from CPO (ID : 1979-013). A washing step is performed after probe hybridization, either at 63°C (A and C), or at 68°C (B and D). Chromosomes are colored in blue and signal from probe C5a is shown in green. A signal is observed on CSO chromosomes when washing is performed at 63°C, but increasing this temperature to 68°C leaves only residual signal. In contrast, the signal observed on CPO chromosomes is not affected by the increase in temperature of the washing step. The residual signal on CSO chromosomes may be explained by non-specific hybridization of the C5a probe on repeated sequences from the CSO genome. Our previous work had identified the presence of a sequence variant (A40C) on 4 chromosome pairs of CSO, that will be detected by the C5a probe if one mismatch is allowed. Taken together, these results suggest that the C5 family is absent from the CSO genome.

```

C6      GCTTC TTGAAGGGAAA GATGTA ACTCTGTGAGATGAATTAACAGAACACAGAGCAGTTTCTCAGAAAGCTTCTTTCCAGTTTGGAA
C6'     -----AAGCTTCTTTCCAGTTTGGAA-----

C6      CGGAAGATATTTCTTTTTCACCATAGCCCTCTATGGGCTTCCAAATATCACTTTGCCAATTAAACAAGAACAGCCTTAGCGAAAG
C6'     CGGAAGATATTTCTTTTTCACCATAGCCCTCTATGGGCTTCCAAATATCACTTTGCCAATTAAACAAGAACAGCCTTAGCGAAAG

C6      -----
C6'     GATTC TTGAAGGGAAA -ATGTA ACTCTGTGAGATGAATTAACAGAACACAGAGCAGTTTCTCAGA-----

```

**Fig. S8 : Alignment of the consensus sequences of the C6 and C6' families.**

The positions of the XmnI and HindIII restriction sites are highlighted in blue and green, respectively. Both sequences are identical on the HindIII-XmnI segment and differ by one single nucleotide variation and one deletion on the XmnI-HindIII segment (C2A-G17Del, highlighted in red).

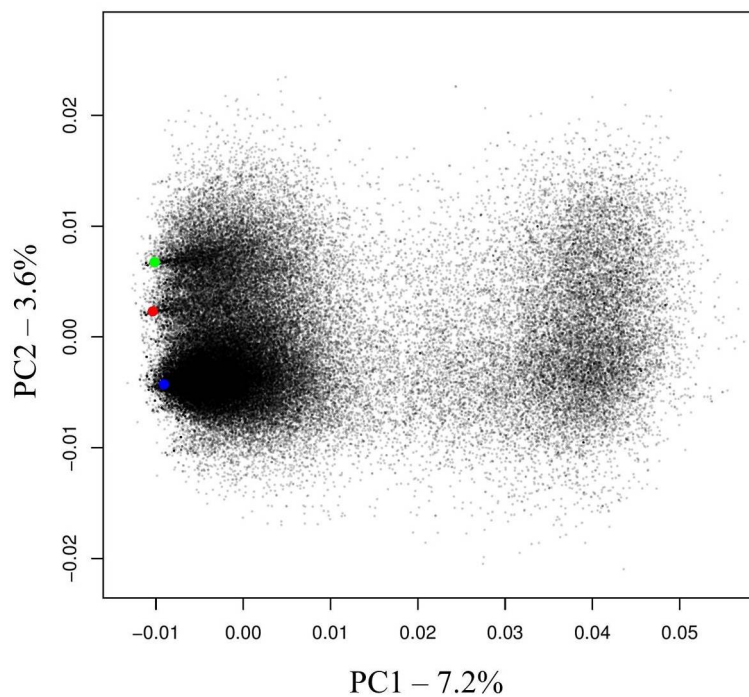

**Fig. S9. Distinction of comet-like clusters within the CSO monomer dataset.** Prediction of the PCA projection of the normalized 5-mer frequency vectors from the CSO monomer dataset within the axis system that best displays principal components 1 and 2 of the PCA from the CPO XmnI monomer dataset. CSO sequences corresponding to the C1 consensus and those containing the T39G variation or the A40C variations are spotted in blue, red and green, respectively (Cacheux et al., 2016).

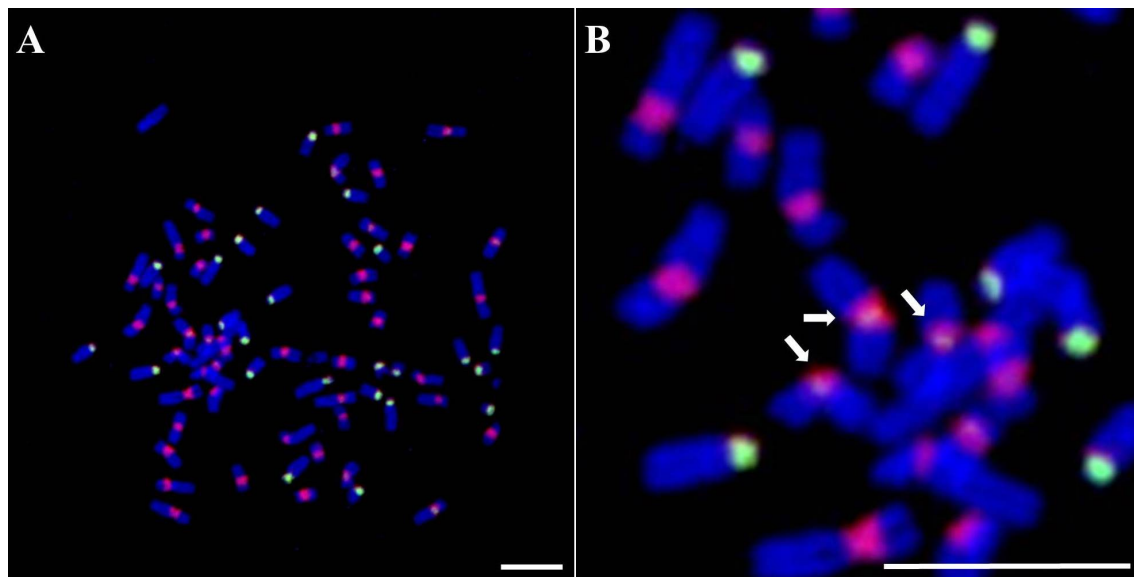

**Fig. S10. Chromosomal distribution of the sequence variants containing a C or a G at position 158.** (A) Probes 158C (red) and 158G (green) are hybridized simultaneously to CPO chromosomes (blue). (B) Focus on image (A) showing that, in addition to strong signals at the centromere of acrocentrics, the 158G probe displays slighter signals (arrows) at the core centromere of several other chromosomes. Scale bar = 10  $\mu$ m.
